# Supplementary material for: Protein-protein interface hot spots prediction based on a hybrid feature selection strategy
Source: PubMed Central journal article supplement (PMC5769548; doi:10.1186/s12859-018-2009-5), 2018-01-15
Supplement: 12859_2018_2009_MOESM2_ESM.pdf [file 12859_2018_2009_MOESM2_ESM.pdf]

Supplementary Information for

## Protein-protein interface hot spots prediction based on a hybrid feature selection strategy

Yanhua Qiao<sup>1</sup>, Yi Xiong<sup>2,3</sup>, Hongyun Gao<sup>4</sup>, Xiaolei Zhu<sup>1\*</sup>, and Peng Chen<sup>5\*</sup>

<sup>1</sup> School of Life Sciences, Anhui University, Hefei, Anhui 230601, China

<sup>2</sup> State Key Laboratory of Microbial Metabolism, Shanghai JiaoTong University, Shanghai 200240, China

<sup>3</sup> School of Life Sciences and Biotechnology, Shanghai JiaoTong University, Shanghai 200240, China

<sup>4</sup> Information and Engineering College, Dalian University, Dalian, Liaoning 116622, China

<sup>5</sup> Institute of Health Sciences, Anhui University, Hefei, Anhui 230601, China

Contact: [xlzhu\\_md1@hotmail.com](mailto:xlzhu_md1@hotmail.com); pchen@ahu.edu.cn

**Table S4.** All 82 features generated in the study.

| No. | Feature description                           | Symbol   |
|-----|-----------------------------------------------|----------|
| 1   | Number of atoms                               | Na       |
| 2   | Number of electrostatic charge                | Nec      |
| 3   | Number of potential hydrogen bonds            | Nphb     |
| 4   | Hydrophobicity                                | Hdrpo    |
| 5   | Hydrophilicity                                | Hdrpi    |
| 6   | Propensity                                    | Prop     |
| 7   | Isoelectric point                             | Isoep    |
| 8   | Mass                                          | Mass     |
| 9   | Expected number of contacts within 14Å sphere | Enc      |
| 10  | Electron-ion interaction potential            | Eiip     |
| 11  | Temperature factor                            | B factor |
| 12  | Unbound total ASA                             | UtASA    |
| 13  | Unbound backbone ASA                          | UbASA    |
| 14  | Unbound side-chain ASA                        | UsASA    |
| 15  | Unbound polar ASA                             | UpASA    |
| 16  | Unbound non-polar ASA                         | UnASA    |
| 17  | Unbound total RASA                            | UtRASA   |
| 18  | Unbound backbone RASA                         | UbRASA   |
| 19  | Unbound side-chain RASA                       | UsRASA   |
| 20  | Unbound polar RASA                            | UpRASA   |
| 21  | Unbound non-polar RASA                        | UnRASA   |

|    |                                                                     |                        |
|----|---------------------------------------------------------------------|------------------------|
| 22 | Unbound total mean DI                                               | UtmDI                  |
| 23 | Unbound side-chain mean DI                                          | UsmDI                  |
| 24 | Unbound maximum DI                                                  | UmaxDI                 |
| 25 | Unbound minimal DI                                                  | UminDI                 |
| 26 | Unbound total mean PI                                               | UtmPI                  |
| 27 | Unbound side-chain mean PI                                          | UsmPI                  |
| 28 | Unbound maximum PI                                                  | UmaxPI                 |
| 29 | Unbound minimal PI                                                  | UminPI                 |
| 30 | Bound total ASA                                                     | BtASA                  |
| 31 | Bound backbone ASA                                                  | BbASA                  |
| 32 | Bound side-chain ASA                                                | BsASA                  |
| 33 | Bound polar ASA                                                     | BpASA                  |
| 34 | Bound non-polar ASA                                                 | BnASA                  |
| 35 | Bound total RASA                                                    | BtRASA                 |
| 36 | Bound backbone RASA                                                 | BbRASA                 |
| 37 | Bound side-chain RASA                                               | BsRASA                 |
| 38 | Bound polar RASA                                                    | BpRASA                 |
| 39 | Bound non-polar RASA                                                | BnRASA                 |
| 40 | Bound total mean DI                                                 | BtmDI                  |
| 41 | Bound side-chain mean DI                                            | BsmDI                  |
| 42 | Bound maximum DI                                                    | BmaxDI                 |
| 43 | Bound minimal DI                                                    | BminDI                 |
| 44 | Bound total mean PI                                                 | BtmPI                  |
| 45 | Bound side-chain mean PI                                            | BsmPI                  |
| 46 | Bound maximum PI                                                    | BmaxPI                 |
| 47 | Bound minimal PI                                                    | BminPI                 |
| 48 | $(ASA_{unb}(total) - ASA_{bnd}(total))^{\frac{1}{2}}$               | $DtASA^{\frac{1}{2}}$  |
| 49 | $(ASA_{unb}(polar) - ASA_{bnd}(polar))^{\frac{1}{2}}$               | $DpASA^{\frac{1}{2}}$  |
| 50 | $(ASA_{unb}(non - polar) - ASA_{bnd}(non - polar))^{\frac{1}{2}}$   | $DnASA^{\frac{1}{2}}$  |
| 51 | $(RASA_{unb}(total) - RASA_{bnd}(total))^{\frac{1}{2}}$             | $DtRASA^{\frac{1}{2}}$ |
| 52 | $(RASA_{unb}(polar) - RASA_{bnd}(polar))^{\frac{1}{2}}$             | $DpRASA^{\frac{1}{2}}$ |
| 53 | $(RASA_{unb}(non - polar) - RASA_{bnd}(non - polar))^{\frac{1}{2}}$ | $DnRASA^{\frac{1}{2}}$ |
| 54 | $ASA_{unb}(total) - ASA_{bnd}(total)$                               | $DtASA$                |
| 55 | $ASA_{unb}(polar) - ASA_{bnd}(polar)$                               | $DpASA$                |
| 56 | $ASA_{unb}(non - polar) - ASA_{bnd}(non - polar)$                   | $DnASA$                |
| 57 | $RASA_{unb}(total) - RASA_{bnd}(total)$                             | $DtRASA$               |
| 58 | $RASA_{unb}(polar) - RASA_{bnd}(polar)$                             | $DpRASA$               |

|    |                                                                                                            |                        |
|----|------------------------------------------------------------------------------------------------------------|------------------------|
| 59 | $RASA_{unb}(non - polar) - RASA_{bnd}(non - polar)$                                                        | $DnRASA$               |
| 60 | $(ASA_{unb}(total) - ASA_{bnd}(total))^{\frac{3}{2}}$                                                      | $DtASA^{\frac{3}{2}}$  |
| 61 | $(ASA_{unb}(polar) - ASA_{bnd}(polar))^{\frac{3}{2}}$                                                      | $DpASA^{\frac{3}{2}}$  |
| 62 | $(ASA_{unb}(non - polar) - ASA_{bnd}(non - polar))^{\frac{3}{2}}$                                          | $DnASA^{\frac{3}{2}}$  |
| 63 | $(RASA_{unb}(total) - RASA_{bnd}(total))^{\frac{3}{2}}$                                                    | $DtRASA^{\frac{3}{2}}$ |
| 64 | $(RASA_{unb}(polar) - RASA_{bnd}(polar))^{\frac{3}{2}}$                                                    | $DpRASA^{\frac{3}{2}}$ |
| 65 | $(RASA_{unb}(non - polar) - RASA_{bnd}(non - polar))^{\frac{3}{2}}$                                        | $DnRASA^{\frac{3}{2}}$ |
| 66 | $(ASA_{unb}(total) - ASA_{bnd}(total))^2$                                                                  | $DtASA^2$              |
| 67 | $(ASA_{unb}(polar) - ASA_{bnd}(polar))^2$                                                                  | $DpASA^2$              |
| 68 | $(ASA_{unb}(non - polar) - ASA_{bnd}(non - polar))^2$                                                      | $DnASA^2$              |
| 69 | $(RASA_{unb}(total) - RASA_{bnd}(total))^2$                                                                | $DtRASA^2$             |
| 70 | $(RASA_{unb}(polar) - RASA_{bnd}(polar))^2$                                                                | $DpRASA^2$             |
| 71 | $(RASA_{unb}(non - polar) - RASA_{bnd}(non - polar))^2$                                                    | $DnRASA^2$             |
| 72 | $(ASA_{unb}(total) - ASA_{bnd}(total))^{\frac{5}{2}}$                                                      | $DtASA^{\frac{5}{2}}$  |
| 73 | $(ASA_{unb}(polar) - ASA_{bnd}(polar))^{\frac{5}{2}}$                                                      | $DpASA^{\frac{5}{2}}$  |
| 74 | $(ASA_{unb}(non - polar) - ASA_{bnd}(non - polar))^{\frac{5}{2}}$                                          | $DnASA^{\frac{5}{2}}$  |
| 75 | $(RASA_{unb}(total) - RASA_{bnd}(total))^{\frac{5}{2}}$                                                    | $DtRASA^{\frac{5}{2}}$ |
| 76 | $(RASA_{unb}(polar) - RASA_{bnd}(polar))^{\frac{5}{2}}$                                                    | $DpRASA^{\frac{5}{2}}$ |
| 77 | $(RASA_{unb}(non - polar) - RASA_{bnd}(non - polar))^{\frac{5}{2}}$                                        | $DnRASA^{\frac{5}{2}}$ |
| 78 | Conservation                                                                                               | CNSV                   |
| 79 | Relative conservation of the actual residue compared to the alanine on a certain position                  | CNSV_REL1              |
| 80 | Relative conservation of the residue with maximum percentage compared to the alanine on a certain position | CNSV_REL2              |
| 81 | Logarithm of CNSV_REL1                                                                                     | logCNSV_REL1           |
| 82 | Logarithm of CNSV_REL2                                                                                     | logCNSV_REL2           |

**Table S5.** The numerical values of 10 different kinds of properties of the 20 amino acids

| Residue | Na <sup>a</sup> | Nec | Nphb | Hdrpo | Hdrpi | Prop  | Isoep | Mass  | Enc   | Eiip   |
|---------|-----------------|-----|------|-------|-------|-------|-------|-------|-------|--------|
| A       | 5               | 0   | 2    | 0.25  | 3     | -0.17 | 6.11  | 71.1  | -22   | 0.0373 |
| C       | 6               | 0   | 2    | 0.04  | -1    | 0.43  | 6.31  | 103.1 | 4.66  | 0.0829 |
| D       | 8               | -1  | 4    | -0.72 | 3     | -0.38 | 5.945 | 115.1 | -4.12 | 0.1263 |
| E       | 9               | -1  | 4    | -0.62 | 3     | -0.13 | 5.785 | 129.1 | -3.64 | 0.0058 |
| F       | 11              | 0   | 2    | 0.61  | -2.5  | 0.82  | 5.755 | 147.2 | 5.27  | 0.0946 |
| G       | 4               | 0   | 2    | 0.16  | 0     | -0.07 | 6.065 | 57    | -1.62 | 0.005  |
| H       | 10              | 0   | 4    | -0.4  | -0.5  | 0.41  | 5.565 | 137.1 | 1.28  | 0.0242 |
| I       | 8               | 0   | 2    | 0.73  | -1.8  | 0.44  | 6.04  | 113.2 | 5.58  | 0      |

|   |    |   |   |       |      |       |       |       |       |        |
|---|----|---|---|-------|------|-------|-------|-------|-------|--------|
| K | 9  | 1 | 2 | -1.1  | 3    | -0.36 | 5.61  | 128.2 | -4.18 | 0.0371 |
| L | 8  | 0 | 2 | 0.53  | -1.8 | 0.4   | 6.035 | 113.2 | 5.01  | 0      |
| M | 8  | 0 | 2 | 0.26  | -1.3 | 0.66  | 5.705 | 131.2 | 3.51  | 0.0823 |
| N | 8  | 0 | 4 | -0.64 | 0.2  | 0.12  | 5.43  | 114.1 | -2.65 | 0.0036 |
| P | 7  | 0 | 2 | -0.07 | 0    | -0.25 | 6.295 | 97.1  | -3.03 | 0.0198 |
| Q | 9  | 0 | 4 | -0.69 | 0.2  | -0.11 | 5.65  | 128.1 | -2.76 | 0.0761 |
| R | 11 | 1 | 4 | -1.76 | -0.5 | 0.27  | 5.405 | 156.2 | -0.93 | 0.0959 |
| S | 6  | 0 | 4 | -0.26 | 0.3  | -0.33 | 5.7   | 87.1  | -2.84 | 0.0829 |
| T | 7  | 0 | 4 | -0.18 | -0.4 | -0.18 | 5.595 | 101.1 | -1.2  | 0.0941 |
| V | 7  | 0 | 2 | 0.54  | -1.5 | 0.27  | 6.015 | 99.1  | 4.45  | 0.0057 |
| W | 14 | 0 | 3 | 0.37  | -3.4 | 0.83  | 5.935 | 186.2 | 52    | 0.0548 |
| Y | 12 | 0 | 3 | 0.02  | -2.3 | 0.66  | 5.705 | 163.2 | 2.15  | 0.0516 |

<sup>a</sup>The explanation of the 10 properties can be found in Table S4.

**Table S6.** Features selected from 82 features and the corresponding cross validation performance in SFS process

| Round | Features identified                                   | Accuracy | Recall | Precision | F-measure |
|-------|-------------------------------------------------------|----------|--------|-----------|-----------|
| 1     | BpRASA                                                | 0.760    | 0.790  | 0.671     | 0.726     |
| 2     | BpRASA, DpASA                                         | 0.838    | 0.774  | 0.814     | 0.793     |
| 3     | BpRASA, DpASA, $DnASA^{3/2}$                          | 0.844    | 0.774  | 0.828     | 0.800     |
| 4     | BpRASA, DpASA, $DnASA^{3/2}$ , BnRASA                 | 0.864    | 0.823  | 0.836     | 0.829     |
| 5     | BpRASA, DpASA, $DnASA^{3/2}$ , BnRASA, BbRASA         | 0.864    | 0.839  | 0.825     | 0.832     |
| 7     | BpRASA, DpASA, $DnASA^{3/2}$ , BnRASA, BbRASA,<br>Enc | 0.864    | 0.839  | 0.825     | 0.832     |

**Table S7.** The top 11 normalized features selected by decision tree, F-score and mRMR.

| No. | decision tree <sup>a</sup> | F-score     | mRMR               |
|-----|----------------------------|-------------|--------------------|
| 1   | BsRASA(37)                 | BsRASA(37)  | BtRASA(35)         |
| 2   | UsASA (14)                 | BtRASA(35)  | $DtASA^{1/2}$ (48) |
| 3   | $DpRASA^{1/2}$ (52)        | BpRASA (38) | B factor (11)      |
| 4   | BsmDI (41)                 | BsASA (32)  | CNSV (78)          |
| 5   | CNSV (78)                  | BsmPI (45)  | Hdrpi (5)          |

|    |                                  |             |                                  |
|----|----------------------------------|-------------|----------------------------------|
| 6  | UpRASA (20)                      | BtASA (30)  | BminPI (47)                      |
| 7  | <i>CNSV_REL1</i> (79)            | BtmPI (44)  | <i>DnASA</i> <sup>5/2</sup> (74) |
| 8  | <i>DtASA</i> <sup>1/2</sup> (48) | BminPI (47) | BpRASA (38)                      |
| 9  | UpASA (15)                       | BpASA (33)  | BtmDI (40)                       |
| 10 | UtmDI (22)                       | BnRASA (39) | BsASA (32)                       |
| 11 | Hdrpo (4)                        | BsmDI (41)  | <i>DtASA</i> <sup>3/2</sup> (60) |

<sup>a</sup> The numbers in the parentheses of columns 2-4 are the feature number in the Table S4.

**Table S8.** Features selected and the corresponding cross-validation performance in PSFS process for normalized features

| Round | Features identified                                | Accuracy | Recall | Precision | F-measure |
|-------|----------------------------------------------------|----------|--------|-----------|-----------|
| 1     | <i>CNSV_REL1</i> , BsRASA                          | 0.766    | 0.790  | 0.681     | 0.731     |
|       | <i>CNSV_REL1</i> , BpRASA                          | 0.766    | 0.710  | 0.710     | 0.710     |
|       | <i>CNSV_REL1</i> , BtRASA                          | 0.766    | 0.694  | 0.717     | 0.705     |
| 2     | <i>CNSV_REL1</i> , BsRASA, UpASA                   | 0.805    | 0.790  | 0.742     | 0.766     |
|       | <i>CNSV_REL1</i> , BtRASA, UpASA                   | 0.799    | 0.807  | 0.725     | 0.763     |
|       | <i>CNSV_REL1</i> , BsRASA, BtmDI                   | 0.812    | 0.742  | 0.780     | 0.760     |
| 3     | <i>CNSV_REL1</i> , BsRASA, UpASA, BminPI           | 0.831    | 0.790  | 0.790     | 0.790     |
|       | <i>CNSV_REL1</i> , BsRASA, BtmDI, UsASA            | 0.825    | 0.774  | 0.787     | 0.780     |
|       | <i>CNSV_REL1</i> , BtRASA, UpASA, BpRASA           | 0.812    | 0.807  | 0.746     | 0.775     |
| 4     | <i>CNSV_REL1</i> , BsRASA, BtmDI, UsASA, BminPI    | 0.831    | 0.823  | 0.773     | 0.796     |
|       | <i>CNSV_REL1</i> , BtRASA, UpASA, BpRASA, B factor | 0.825    | 0.839  | 0.754     | 0.794     |

|   |                                                                                                |       |       |       |       |
|---|------------------------------------------------------------------------------------------------|-------|-------|-------|-------|
|   | <i>CNSV_REL1</i> , BsRASA, UpASA, BminPI, <i>DpRASA</i> <sup>1/2</sup>                         | 0.825 | 0.823 | 0.761 | 0.791 |
| 5 | <i>CNSV_REL1</i> , BsRASA, BtmDI, UsASA, BminPI, UtmDI                                         | 0.838 | 0.823 | 0.785 | 0.803 |
|   | <i>CNSV_REL1</i> , BtRASA, UpASA, BpRASA, B factor, BtmDI                                      | 0.831 | 0.855 | 0.757 | 0.803 |
|   | <i>CNSV_REL1</i> , BtRASA, UpASA, BpRASA, B factor, BsmDI                                      | 0.831 | 0.855 | 0.757 | 0.803 |
| 6 | <i>CNSV_REL1</i> , BtRASA, UpASA, BpRASA, B factor, BtmDI, UtmDI                               | 0.857 | 0.839 | 0.813 | 0.825 |
|   | <i>CNSV_REL1</i> , BtRASA, UpASA, BpRASA, B factor, BtmDI, BsASA                               | 0.838 | 0.871 | 0.761 | 0.812 |
|   | <i>CNSV_REL1</i> , BsRASA, BtmDI, UsASA, BminPI, UtmDI, BsmDI                                  | 0.844 | 0.823 | 0.797 | 0.810 |
| 7 | <i>CNSV_REL1</i> , BtRASA, UpASA, BpRASA, B factor, BtmDI, UtmDI, <i>DpRASA</i> <sup>1/2</sup> | 0.844 | 0.823 | 0.797 | 0.810 |
|   | <i>CNSV_REL1</i> , BtRASA, UpASA, BpRASA, B factor, BtmDI, UtmDI, BsRASA                       | 0.838 | 0.823 | 0.785 | 0.803 |
|   | <i>CNSV_REL1</i> , BtRASA, UpASA, BpRASA, B factor, BtmDI, UtmDI, <i>DtASA</i> <sup>1/2</sup>  | 0.838 | 0.807 | 0.794 | 0.800 |

**Table S9.** Consensus results based on combining any two of the five models (MINERVA2, APIS, KFC2a, KFC2b, Our model).

| Methods     | Accuracy      | Specificity   | Recall        | Precision     | F-measure     |
|-------------|---------------|---------------|---------------|---------------|---------------|
| Our-APIS    | 0.6631        | 0.5672        | <b>0.8929</b> | 0.4630        | 0.6098        |
| Our-MIN     | 0.7053        | 0.6418        | 0.8571        | 0.5000        | 0.6316        |
| Our-KFC2a   | 0.6737        | 0.5821        | <b>0.8929</b> | 0.4717        | 0.6173        |
| Our-KFC2b   | 0.6947        | 0.6269        | 0.8571        | 0.4898        | 0.6233        |
| APIS-KFC2b  | 0.7053        | 0.7164        | 0.6786        | 0.5000        | 0.5758        |
| MIN-KFC2b   | 0.7263        | <b>0.7910</b> | 0.5714        | 0.5333        | 0.5517        |
| KFC2a-KFC2b | <b>0.7368</b> | 0.7164        | 0.7857        | <b>0.5366</b> | <b>0.6377</b> |
| APIS-KFC2a  | 0.6947        | 0.6567        | 0.7857        | 0.4889        | 0.6027        |
| MIN-KFC2a   | 0.7263        | 0.7015        | 0.7857        | 0.5238        | 0.6286        |
| APIS-MIN    | 0.7263        | 0.7612        | 0.6429        | 0.5294        | 0.5806        |

**Table S10.** Interface information referred to the interfaces in the independent test set.

| Interfaces | Recorded in SCOPPI? | SIZE  | $\Delta\text{ASA}/(\text{\AA}^2)$ <sup>a</sup> |
|------------|---------------------|-------|------------------------------------------------|
| 1CDL(A:E)  | No                  | Small | 1394                                           |

|           |     |        |      |
|-----------|-----|--------|------|
| 1DVA(H:X) | No  | Small  | 611  |
| 1DX5(N:J) | Yes | Small  | 874  |
| 1EBP(A:C) | Yes | Small  | 521  |
| 1EBP(A:D) | Yes | Small  | 314  |
| 1ES7(A:B) | Yes | Medium | 1679 |
| 1ES7(A:D) | Yes | Small  | 777  |
| 1FAK(T:H) | Yes | Small  | 1147 |
| 1FAK(T:L) | Yes | Small  | 753  |
| 1FAK(T:L) | Yes | Small  | 801  |
| 1FOE(A:B) | Yes | Large  | 3056 |
| 1G3I(A:G) | Yes | Small  | 1055 |
| 1G3I(A:H) | Yes | Small  | 699  |
| 1GL4(A:B) | Yes | Large  | 2007 |
| 1IHB(A:B) | Yes | Small  | 659  |
| 1JAT(A:B) | Yes | Medium | 1468 |
| 1JPP(B:D) | No  | Small  | 551  |
| 1MQ8(A:B) | Yes | Small  | 1241 |
| 1NUN(A:B) | Yes | Large  | 2086 |
| 1UB4(A:C) | Yes | Large  | 2785 |
| 2HHB(A:B) | Yes | Medium | 1649 |

<sup>a</sup> The  $\Delta$ ASA of 1CDL, 1DVA, 1JPP were calculated by NACCESS [1], because the interfaces were not recorded in SCOPPI [2].

**Table S11.** Statistical performance of our model for predicting hotspots of the independent test set by the types of protein-protein interfaces.

| Types of interfaces                     | Accuracy | Specificity | Recall | Precision | F-measure    |
|-----------------------------------------|----------|-------------|--------|-----------|--------------|
| All residues (28 HS/<br>67 NS)          | 0.705    | 0.657       | 0.821  | 0.500     | 0.621        |
| SCOPPI interface<br>(24 HS/ 49 NS)      | 0.753    | 0.657       | 0.833  | 0.588     | <b>0.689</b> |
| Non SCOPPI<br>interface (4 HS/18<br>NS) | 0.545    | 0.714       | 0.75   | 0.250     | 0.375        |
| Small interface (19<br>HS/56 NS)        | 0.707    | 0.500       | 0.789  | 0.455     | 0.577        |
| Medium interface (3<br>HS/4 NS)         | 0.714    | 0.679       | 1.00   | 0.6       | <b>0.750</b> |
| Large interface (6<br>HS/7 NS)          | 0.692    | 0.500       | 0.833  | 0.625     | <b>0.714</b> |

**Table S12.** The top 10 features selected by decision tree, F-score, and mRMR from the old 48 features reported in Xia et al.

| No. | Decision tree <sup>a</sup> | F-score     | mRMR          |
|-----|----------------------------|-------------|---------------|
| 1   | BsRASA (37)                | BsRASA (37) | BtRASA (35)   |
| 2   | UsASA (14)                 | BtRASA (35) | B factor (11) |
| 3   | CNSV (78)                  | BpRASA (38) | CNSV(78)      |
| 4   | BsmDI (41)                 | BsASA (32)  | Hdrpi (5)     |
| 5   | UmaxPI (28)                | BsmPI (45)  | BminPI (47)   |
| 6   | UpASA (15)                 | BtASA (30)  | BpRASA (38)   |
| 7   | Prop (6)                   | BtmPI (44)  | BtmDI (40)    |
| 8   | UtmDI (22)                 | BminPI (47) | UminDI (25)   |
| 9   | UnASA (16)                 | BpASA (33)  | BnRASA (39)   |
| 10  | Eiip (10)                  | BnRASA (39) | BsASA (32)    |

<sup>a</sup> The numbers in the parentheses of columns 2-4 are the feature number in the Table S4.

**Table S13.** Features selected and the corresponding cross-validation performances in PSFS process for the 48 old features reported in Xia et al.'s paper [3].

| Round | Features identified   | Accuracy | Recall | Precision | F-measure |
|-------|-----------------------|----------|--------|-----------|-----------|
| 1     | BsRASA                | 0.760    | 0.790  | 0.671     | 0.726     |
|       | BpRASA                | 0.714    | 0.823  | 0.607     | 0.699     |
|       | BtRASA                | 0.753    | 0.710  | 0.688     | 0.698     |
| 2     | BsRASA, UsASA         | 0.818    | 0.774  | 0.774     | 0.774     |
|       | BsRASA, BsASA         | 0.812    | 0.790  | 0.754     | 0.772     |
|       | BsRASA, UpASA         | 0.773    | 0.839  | 0.675     | 0.748     |
| 3     | BsRASA, UsASA, BsASA  | 0.851    | 0.774  | 0.842     | 0.807     |
|       | BsRASA, UsASA, UnASA  | 0.838    | 0.807  | 0.794     | 0.800     |
|       | BsRASA, UpASA, BpRASA | 0.812    | 0.855  | 0.726     | 0.785     |



|   |                                                     |       |       |       |       |
|---|-----------------------------------------------------|-------|-------|-------|-------|
| 4 | BsRASA, UsASA, UnASA, UpASA                         | 0.851 | 0.807 | 0.820 | 0.813 |
|   | BsRASA, UsASA, UnASA, B factor                      | 0.851 | 0.807 | 0.820 | 0.813 |
|   | BsRASA, UsASA, UnASA, BtmDI                         | 0.844 | 0.823 | 0.797 | 0.810 |
| 5 | BsRASA, UsASA, UnASA, B factor, CNSV                | 0.864 | 0.807 | 0.848 | 0.826 |
|   | BsRASA, UsASA, UnASA, BtmDI, BsmDI                  | 0.857 | 0.823 | 0.823 | 0.823 |
|   | BsRASA, UsASA, UnASA, B factor, BsmDI               | 0.857 | 0.823 | 0.823 | 0.823 |
| 6 | BsRASA, UsASA, UnASA, B factor, CNSV, UtmDI         | 0.870 | 0.823 | 0.850 | 0.836 |
|   | BsRASA, UsASA, UnASA, B factor, CNSV, UmaxPI        | 0.864 | 0.807 | 0.848 | 0.826 |
|   | BsRASA, UsASA, UnASA, B factor, CNSV, UminDI        | 0.864 | 0.807 | 0.848 | 0.826 |
| 7 | BsRASA, UsASA, UnASA, B factor, CNSV, UtmDI, UminDI | 0.870 | 0.823 | 0.850 | 0.836 |
|   | BsRASA, UsASA, UnASA, B factor, CNSV, UtmDI, BminPI | 0.870 | 0.823 | 0.850 | 0.836 |
|   | BsRASA, UsASA, UnASA, B factor, CNSV, UmaxPI, UtmDI | 0.864 | 0.823 | 0.836 | 0.829 |

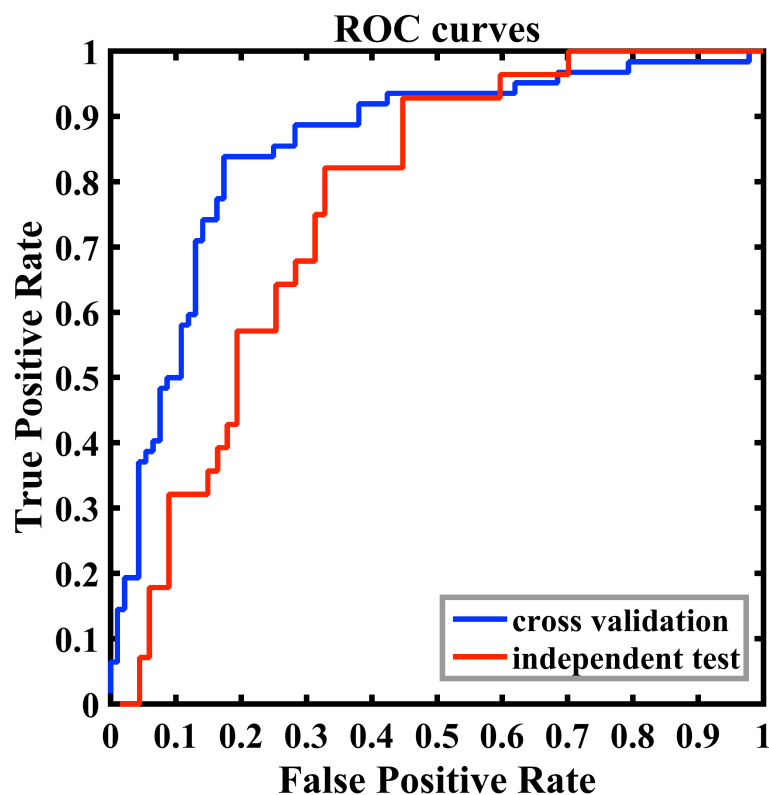

**Figure S1.** The ROC curves for cross-validation results of the training data set and the predictive results of the independent test set.

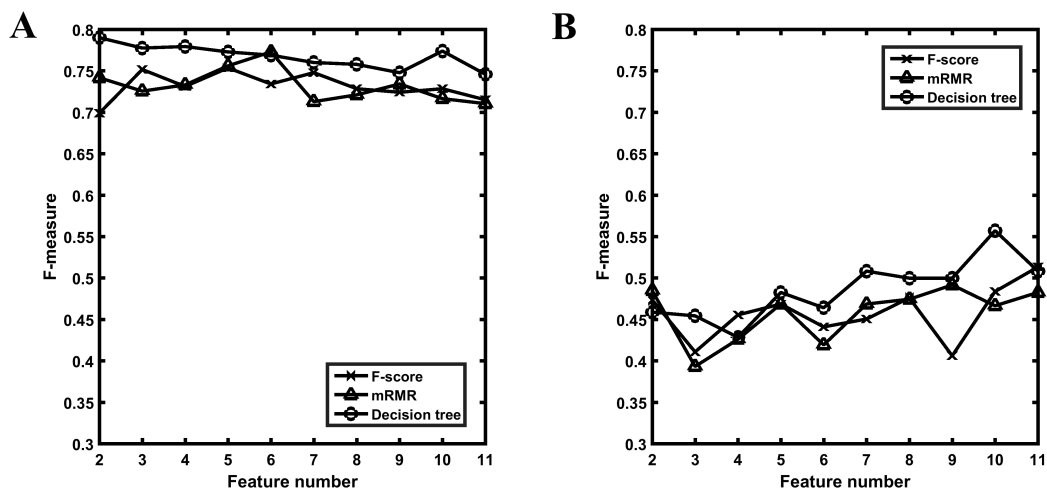

**Figure S2.** The F-measures based on different number of normalized features selected by different methods. A. F-measures on the cross validation; B. F-measures on the independent test set.

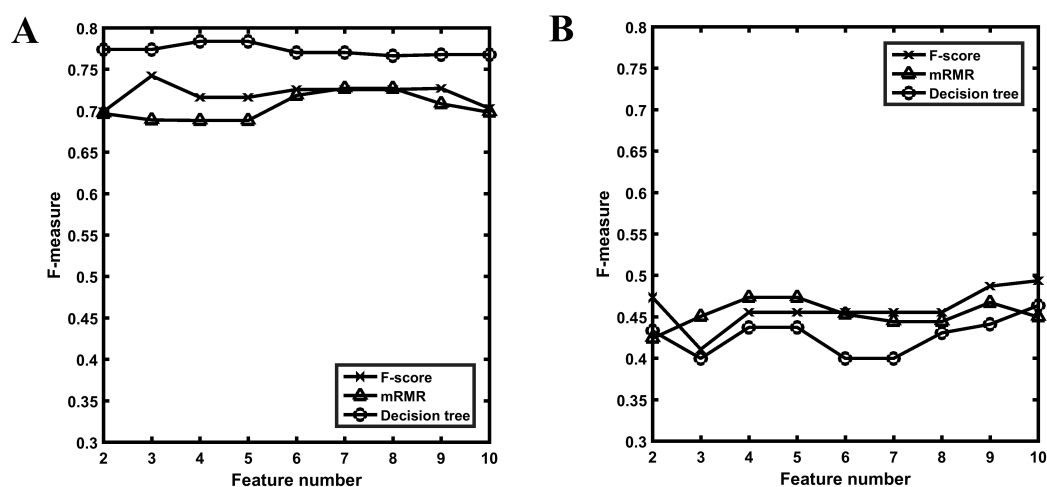

**Figure S3.** The F-measures based on different number of features selected by different methods from the 48 old features selected by different methods. A. F-measures on the cross validation; B. F-measures on the independent test set.

1. Hubbard SJ, Thornton JM: **Naccess. Computer Program, Department of Biochemistry and Molecular Biology. University College London 1993, 2(1).**
2. Winter C, Henschel A, Kim WK, Schroeder M: **SCOPPI: a structural classification of protein-protein interfaces. Nucleic acids research 2006, 34(Database issue):D310-314.**

3. Xia JF, Zhao XM, Song J, Huang DS: **APIS: accurate prediction of hot spots in protein interfaces by combining protrusion index with solvent accessibility.** *BMC bioinformatics* 2010, **11**:174.
